# Supplementary material
Source: publisher figshare collection journal article supplement (https://karger.figshare.com/ndownloader/files/13112573)
Supplement: Supplementary file 1 [file 13112573]

**Supplementary Table 1: Typical abnormal ECG findings in CCC patients**

| ECG findings (%) | CCC Patients  M SEV | |
| --- | --- | --- |
| RBBB | 50 | 35 |
| LAH | 52 | 35 |
| LBBB | 3 | 5 |
| VE | 34 | 22 |
| SVE | 5 | 5 |
| RBBB + LAH | 29 | 18 |
| RBBB/LAH + VE | 16 | 12 |
| FAVB | 10 | - |
| VT | - | 22 |
| NSVT | - | 9 |
| ST | - | 13 |
| AVB | - | 56 |

Data were shown as percentage of abnormal findings among groups. RBBB: Right bundle branch block. LAH: Left anterior hemiblock. LBBB: Left bundle branch block. VE: ventricular extrasystolies. SVE: Supraventricular extrasystolies. FAVB: first degree atrioventricular block. VT: Ventricular tachycardia. NSVT: Non-sustained ventricular tachycardia. ST: Supraventricular tachycardia. AVB: total atrioventricular block. CCC: Chronic Chagas cardiomyopathy; M: Mild to Moderate CCC; SEV: Severe CCC.
